## AUTHOR CORRECTION

**Love, D. C., Kochran, J., Cathey, R. L., Shin, S.-H. and Hanover, J. A.** (2003). Mitochondrial and nucleocytoplasmic targeting of O-linked GlcNAc transferase. *J. Cell Sci.* **116**, 647-654.

There were two errors in both the online and print versions of this paper. The second author J. Kochan was spelt incorrectly. In addition, a line was omitted from the acknowledgements. The correct author spelling and complete acknowledgement is shown below.

**Mitochondrial and nucleocytoplasmic targeting of O-linked GlcNAc transferase**

**Dona C. Love<sup>1</sup>, Jarema P. Kochan<sup>2</sup>, R. Lamont Cathey<sup>1,\*</sup>, Sang-Hoon Shin<sup>1</sup> and John A. Hanover<sup>1,‡</sup>**

<sup>1</sup>Laboratory of Cell Biochemistry and Biology, NIDDK, National Institutes of Health, Bethesda, MD, 20892, USA

<sup>2</sup>Department of Metabolic Diseases, Hoffman-La Roche Inc., 340 Kingsland Street, Nutley, NJ, 07110, USA

\*Present address: Department of General Surgery, Carolinas Medical Center, Charlotte, NC 28232-2861, USA

‡Author for correspondence (e-mail: jah@helix.nih.gov)

The authors gratefully acknowledge William Prinz and Jenny Hinshaw for help and advice with mitochondrial subfractionation and electron microscopy, and the expert assistance of Charles Burghardt in the preparation of the OGT antibodies. The authors also thank William Lubas for helpful discussions and reagents.
